# Supplementary material
Source: PubMed Central journal article supplement (PMC8609464)
Supplement: jamainternmed-e216759-s003.pdf [file jamainternmed-e216759-s003.pdf]

## Data Sharing Statement

Clemency. Efficacy of Inhaled Ciclesonide for Outpatient Treatment of Adolescents and Adults With Symptomatic COVID-19. *JAMA Intern Med.* Published November 22, 2021.

doi:10.1001/jamainternmed.2021.6759

### Data

**Data available:** Yes

**Data types:** Deidentified participant data

**How to access data:** [research@covispharma.com](mailto:research@covispharma.com)

**When available:** With publication

### Supporting Documents

**Document types:** None

### Additional Information

**Who can access the data:** Researchers whose proposed use of the data has been approved

**Types of analyses:** for a specified purpose

**Mechanisms of data availability:** After approval of the proposal
